# Supplementary material for: Protective effect of a first SARS-CoV-2 infection from reinfection: a matched retrospective cohort study using PCR testing data in England
Source: bioRxiv or medRxiv preprint supplement (doi:10.1101/2022.01.10.22268896), 2022-01-10
Supplement: Supplementary file [file media-1.pdf]

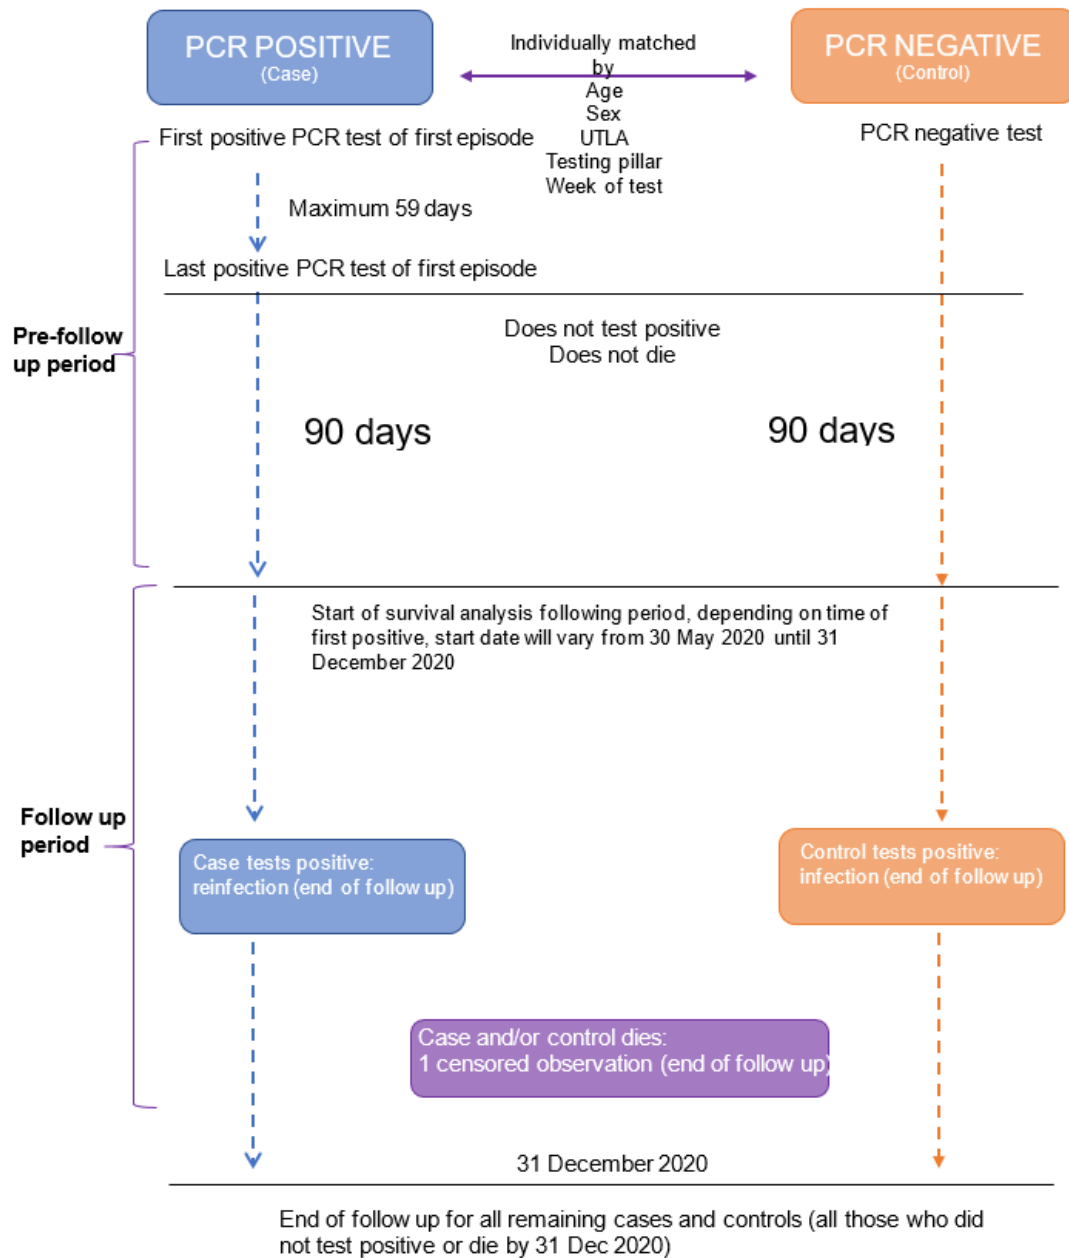

**Supplementary Figure S1** Diagram explaining the follow up time for PCR positive cases and their matched PCR negative control

**Supplementary table S1** Individuals that had symptoms at their second test within population that had a positive PCR test (post hoc population) during the follow up period and results of univariable and multivariable logistical regression

|                            | Number asymptomatic at positive test | Number with symptoms at positive test (% of total with symptom information) | Number with missing symptom information at second test (%) | Univariable odds ratio logistic regression for symptoms at second test | Multivariable odds ratio logistic regression for symptoms at second test *<br>adjusted for all variables reported |
|----------------------------|--------------------------------------|-----------------------------------------------------------------------------|------------------------------------------------------------|------------------------------------------------------------------------|-------------------------------------------------------------------------------------------------------------------|
| <b>First test</b>          |                                      |                                                                             |                                                            |                                                                        |                                                                                                                   |
| Negative (Control)         | 2,983                                | 5860 (66.3)                                                                 | 2875 (24.5)                                                | 1                                                                      | 1                                                                                                                 |
| Positive (Case)            | 1,163                                | 499 (30)                                                                    | 599 (26.5)                                                 | 0.22 (0.19 0.24)                                                       | 0.23 (0.2 0.26)                                                                                                   |
| <b>Sex</b>                 |                                      |                                                                             |                                                            |                                                                        |                                                                                                                   |
| F                          | 3,075                                | 3948 (56.2)                                                                 | 2256 (24.3)                                                | 1                                                                      | 1                                                                                                                 |
| M                          | 1,071                                | 2411 (69.2)                                                                 | 1218 (25.9)                                                | 1.75 (1.61 1.91)                                                       | 1.67 (1.51 1.84)                                                                                                  |
| <b>Age</b>                 |                                      |                                                                             |                                                            |                                                                        |                                                                                                                   |
| Aged 10-49 years           | 2,005                                | 4728 (70.2)                                                                 | 1482 (18)                                                  | 1                                                                      | 1                                                                                                                 |
| Aged 50 and above          | 2,141                                | 1631 (43.2)                                                                 | 1992 (34.6)                                                | 0.32 (0.3 0.35)                                                        | 0.33 (0.3 0.36)                                                                                                   |
| <b>Month of first test</b> |                                      |                                                                             |                                                            |                                                                        |                                                                                                                   |
| March                      | 65                                   | 146 (69.2)                                                                  | 260 (55.2)                                                 | 1.17 (0.86 1.6)                                                        | 2.14 (1.48 3.08)                                                                                                  |
| April                      | 970                                  | 1687 (63.5)                                                                 | 1566 (37.1)                                                | 0.91 (0.79 1.04)                                                       | 1.32 (1.14 1.54)                                                                                                  |
| May                        | 1,535                                | 1715 (52.8)                                                                 | 944 (22.5)                                                 | 0.58 (0.51 0.66)                                                       | 0.84 (0.73 0.97)                                                                                                  |
| June                       | 542                                  | 747 (58)                                                                    | 312 (19.5)                                                 | 0.72 (0.62 0.84)                                                       | 0.86 (0.72 1.02)                                                                                                  |
| July                       | 254                                  | 536 (67.8)                                                                  | 150 (16)                                                   | 1.1 (0.92 1.32)                                                        | 1.19 (0.97 1.47)                                                                                                  |
| August                     | 260                                  | 531 (67.1)                                                                  | 99 (11.1)                                                  | 1.07 (0.89 1.28)                                                       | 1.2 (0.98 1.48)                                                                                                   |
| September                  | 520                                  | 997 (65.7)                                                                  | 143 (8.6)                                                  | 1                                                                      | 1                                                                                                                 |
| <b>Region</b>              |                                      |                                                                             |                                                            |                                                                        |                                                                                                                   |
| London                     | 313                                  | 803 (72)                                                                    | 427 (27.7)                                                 | 1                                                                      | 1                                                                                                                 |
| East Midlands              | 529                                  | 681 (56.3)                                                                  | 275 (18.5)                                                 | 0.5 (0.42 0.6)                                                         | 0.56 (0.46 0.69)                                                                                                  |
| East of England            | 369                                  | 490 (57)                                                                    | 351 (29)                                                   | 0.52 (0.43 0.62)                                                       | 0.62 (0.5 0.77)                                                                                                   |
| North East                 | 253                                  | 372 (59.5)                                                                  | 360 (36.5)                                                 | 0.57 (0.47 0.7)                                                        | 0.69 (0.54 0.87)                                                                                                  |
| North West                 | 805                                  | 1509 (65.2)                                                                 | 754 (24.6)                                                 | 0.73 (0.63 0.85)                                                       | 0.79 (0.65 0.94)                                                                                                  |
| South East                 | 583                                  | 640 (52.3)                                                                  | 496 (28.9)                                                 | 0.43 (0.36 0.51)                                                       | 0.47 (0.38 0.57)                                                                                                  |
| South West                 | 204                                  | 190 (48.2)                                                                  | 142 (26.5)                                                 | 0.36 (0.29 0.46)                                                       | 0.43 (0.33 0.57)                                                                                                  |
| West Midlands              | 514                                  | 673 (56.7)                                                                  | 376 (24.1)                                                 | 0.51 (0.43 0.61)                                                       | 0.56 (0.46 0.69)                                                                                                  |
| Yorkshire and Humber       | 576                                  | 1001 (63.5)                                                                 | 293 (15.7)                                                 | 0.68 (0.57 0.8)                                                        | 0.72 (0.59 0.87)                                                                                                  |

|                         |       |             |             |                  |   |                  |
|-------------------------|-------|-------------|-------------|------------------|---|------------------|
| <b>Ethnicity</b>        |       |             |             |                  |   |                  |
| White                   | 3,210 | 4548 (58.6) | 2560 (24.8) |                  | 1 | 1                |
| Asian or Asian British  | 305   | 917 (75)    | 332 (21.4)  | 2.12 (1.85 2.43) |   | 1.56 (1.34 1.81) |
| Black or Black British  | 173   | 152 (46.8)  | 110 (25.3)  | 0.62 (0.5 0.77)  |   | 0.44 (0.34 0.56) |
| Mixed                   | 57    | 103 (64.4)  | 40 (20)     | 1.28 (0.92 1.77) |   | 0.97 (0.68 1.39) |
| Other ethnic groups     | 81    | 169 (67.6)  | 91 (26.7)   | 1.47 (1.13 1.93) |   | 0.97 (0.72 1.31) |
| Missing                 | 320   | 470 (59.5)  | 341 (30.2)  |                  |   |                  |
|                         |       |             |             |                  |   |                  |
| <b>IMD quintiles</b>    |       |             |             |                  |   |                  |
| 1                       | 1,171 | 1780 (60.3) | 915 (23.7)  |                  | 1 |                  |
| 2                       | 950   | 1419 (59.9) | 789 (25)    | 0.98 (0.88 1.1)  |   |                  |
| 3                       | 782   | 1161 (59.8) | 660 (25.4)  | 0.98 (0.87 1.1)  |   |                  |
| 4                       | 693   | 1087 (61.1) | 623 (25.9)  | 1.03 (0.91 1.16) |   |                  |
| 5                       | 539   | 901 (62.6)  | 481 (25)    | 1.1 (0.97 1.25)  |   |                  |
| Missing                 | 11    | 11 (50)     | 6 (21.4)    |                  |   |                  |
|                         |       |             |             |                  |   |                  |
| <b>First test route</b> |       |             |             |                  |   |                  |
| Hospital testing        | 1,111 | 1760 (61.3) | 2686 (48.3) |                  | 1 |                  |
| Community testing       | 3,035 | 4599 (60.2) | 788 (9.4)   | 0.96 (0.88 1.04) |   |                  |

**Supplementary table S2** Individuals that had S gene target failure (SGTF) at their second test within population that had a positive PCR test from 15 November onwards (N=3128 with S gene target information, 5307 missing S gene target information) and results of univariable and multivariable logistical regression

|                                        | Number positive for S gene at second test | Number with S gene target failure (% of total with S gene target) | Number tests after 15 Nov 2020 missing S gene target information (%) | Univariable odds ratio logistic regression for S gene negative | Multivariable odds ratio logistic regression for S gene negative at second test * adjusted for all variables reported |
|----------------------------------------|-------------------------------------------|-------------------------------------------------------------------|----------------------------------------------------------------------|----------------------------------------------------------------|-----------------------------------------------------------------------------------------------------------------------|
| <b>First test</b>                      |                                           |                                                                   |                                                                      |                                                                |                                                                                                                       |
| Negative (Control)                     | 1,632                                     | 1205 (42.5)                                                       | 4358 (60.6)                                                          | 1                                                              | 1                                                                                                                     |
| Positive (Case)                        | 132                                       | 159 (54.6)                                                        | 949 (76.5)                                                           | 1.63 (1.28 2.08)                                               | 1.9 (1.43 2.51)                                                                                                       |
| <b>Region</b>                          |                                           |                                                                   |                                                                      |                                                                |                                                                                                                       |
| London, South East and East of England | 247                                       | 689 (73.6)                                                        | 2541 (73.1)                                                          | 1                                                              | 1                                                                                                                     |
| Rest of England                        | 1,517                                     | 675 (30.8)                                                        | 2766 (55.8)                                                          | 0.16 (0.13 0.19)                                               | 0.14 (0.11 0.17)                                                                                                      |
| <b>Age</b>                             |                                           |                                                                   |                                                                      |                                                                |                                                                                                                       |
| Aged 10-49 years                       | 1,256                                     | 1027 (45)                                                         | 2823 (55.3)                                                          | 1                                                              | 1                                                                                                                     |
| Aged 50 and above                      | 508                                       | 337 (39.9)                                                        | 2484 (74.6)                                                          | 0.81 (0.69 0.95)                                               | 0.9 (0.74 1.08)                                                                                                       |
| <b>Month of first test</b>             |                                           |                                                                   |                                                                      |                                                                |                                                                                                                       |
| March                                  | 34                                        | 30 (46.9)                                                         | 222 (77.6)                                                           | 0.64 (0.38 1.06)                                               | 0.39 (0.22 0.71)                                                                                                      |
| April                                  | 377                                       | 307 (44.9)                                                        | 1591 (69.9)                                                          | 0.59 (0.48 0.72)                                               | 0.4 (0.31 0.51)                                                                                                       |
| May                                    | 448                                       | 241 (35)                                                          | 1400 (67)                                                            | 0.39 (0.32 0.48)                                               | 0.31 (0.24 0.39)                                                                                                      |
| June                                   | 188                                       | 76 (28.8)                                                         | 492 (65.1)                                                           | 0.29 (0.22 0.4)                                                | 0.23 (0.16 0.32)                                                                                                      |
| July                                   | 149                                       | 98 (39.7)                                                         | 313 (55.9)                                                           | 0.48 (0.36 0.64)                                               | 0.41 (0.29 0.57)                                                                                                      |
| August                                 | 238                                       | 156 (39.6)                                                        | 415 (51.3)                                                           | 0.47 (0.37 0.61)                                               | 0.37 (0.28 0.49)                                                                                                      |
| September                              | 330                                       | 456 (58)                                                          | 874 (52.7)                                                           | 1                                                              | 1                                                                                                                     |
| <b>Ethnicity</b>                       |                                           |                                                                   |                                                                      |                                                                |                                                                                                                       |
| White                                  | 1,258                                     | 953 (43.1)                                                        | 3926 (64)                                                            | 1                                                              | 1                                                                                                                     |
| Asian or Asian British                 | 283                                       | 195 (40.8)                                                        | 515 (51.9)                                                           | 0.91 (0.74 1.11)                                               | 0.76 (0.61 0.96)                                                                                                      |
| Black or Black British                 | 38                                        | 48 (55.8)                                                         | 208 (70.7)                                                           | 1.67 (1.08 2.57)                                               | 1.05 (0.65 1.72)                                                                                                      |

|                         |       |             |             |                  |                  |
|-------------------------|-------|-------------|-------------|------------------|------------------|
| Mixed                   | 17    | 24 (58.5)   | 81 (66.4)   | 1.86 (1 3.49)    | 1.21 (0.59 2.48) |
| Other ethnic groups     | 33    | 46 (58.2)   | 155 (66.2)  | 1.84 (1.17 2.9)  | 0.9 (0.53 1.51)  |
| Missing                 | 135   | 98 (42.1)   | 422 (64.4)  |                  |                  |
| <b>First test route</b> |       |             |             |                  |                  |
| Hospital testing        | 424   | 350 (45.2)  | 2431 (75.9) |                  | 1                |
| Community testing       | 1,340 | 1014 (43.1) | 2876 (55)   | 0.92 (0.78 1.08) |                  |
| <b>Sex</b>              |       |             |             |                  |                  |
| F                       | 1,143 | 835 (42.2)  | 3565 (64.3) |                  | 1                |
| M                       | 621   | 529 (46)    | 1742 (60.2) | 1.17 (1.01 1.35) |                  |
| <b>IMD quintiles</b>    |       |             |             |                  |                  |
| 1                       | 564   | 347 (38.1)  | 1235 (57.5) |                  | 1                |
| 2                       | 394   | 312 (44.2)  | 1197 (62.9) | 1.29 (1.05 1.57) |                  |
| 3                       | 318   | 284 (47.2)  | 1092 (64.5) | 1.45 (1.18 1.79) |                  |
| 4                       | 260   | 229 (46.8)  | 988 (66.9)  | 1.43 (1.15 1.79) |                  |
| 5                       | 226   | 189 (45.5)  | 781 (65.3)  | 1.36 (1.07 1.72) |                  |
| Missing                 | 2     | 3 (60)      | 14 (73.7)   |                  |                  |
